# Supplementary material for: Template-free hydrothermal synthesis of MgWO4 nanoplates and their application as photocatalysts
Source: Royal Society of Chemistry journal article supplement (doi:10.1039/c8ra06671j), 2019-01-01
Supplement: c8ra06671j1.pdf [file c8ra06671j1.pdf]

## *Supplementary Materials*

### Template-free hydrothermal synthesis of MgWO<sub>4</sub> nanoplates and their application as photocatalysts

Jie Meng,<sup>1</sup> Tao Chen,<sup>1</sup> Xiao Wei, \* Jixue Li, Ze Zhang\*

*Center of Electron Microscopy, State Key Laboratory of Silicon Materials, and School of Materials Science and Engineering, Zhejiang University, Hangzhou, 310027, PR China*

\*Corresponding author. Tel. +86 571 87952797; fax: +86 571 87952797;

E-mail address: mseweixiao@zju.edu.cn (X. Wei); zezhang@zju.edu.cn (Z. Zhang).

<sup>1</sup> These authors contributed equally to this work

#### **Experimental section**

##### **Preparation**

All reagents were analytical stage in this experiment without further purification. The MgWO<sub>4</sub> nanoplates were prepared by one-step hydrothermal reaction. Firstly, an exact stoichiometric amount of sodium tungstate dehydrate (Na<sub>2</sub>WO<sub>4</sub>•2H<sub>2</sub>O, 5 mmol) and magnesium acetate tetrahydrate of (Mg(CH<sub>3</sub>COO)<sub>2</sub>•4H<sub>2</sub>O, 5 mmol) were dissolved in 35 mL deionized water to form a clear solution under stirring for 10 min. Subsequently, the above aqueous solution was transferred into a 50 mL Teflon-lined stainless autoclave, heated at 180 °C for 12 h in an oven and cooled to ambient temperature by furnace cooling. Finally, the obtained white precipitates were washed, centrifuged and dried at 80 °C for overnight to get the MgWO<sub>4</sub> nanoplates (namely MWO nanoplates).

For comparison in photocatalytic reaction, the MgWO<sub>4</sub> nanoparticles (namely

MWO nanoparticles) were prepared by solvothermal treatment using ethylene glycol (30 mL) and H<sub>2</sub>O (10 mL) as solvent. The amounts of Na<sub>2</sub>WO<sub>4</sub>•2H<sub>2</sub>O and Mg(CH<sub>3</sub>COO)<sub>2</sub>•4H<sub>2</sub>O are all 10 mmol. The other procedures were similar to those mentioned above in MgWO<sub>4</sub> synthesis.

### **Characterization**

The field emission scanning electron microscopy (SEM) and transmission electron microscopy (TEM) with an energy dispersive X-ray spectrometer (EDX) for elemental analysis were performed on Hitachi SU-70 and Tecnai G<sup>2</sup> F20, respectively. X-Ray photoelectron spectra (XPS) were carried out on an Escalab 250Xi for the surface electronic states. The crystalline phase of as-prepared MgWO<sub>4</sub> samples was characterized by X-Ray powder diffraction (XRD) on a PANalytical X'Pert PRO X-ray powder diffractometer with monochromatic Cu K $\alpha$  radiation in the range of 10-90°. UV-vis diffuse reflectance spectra were recorded with a spectrophotometer (Persee TU-1900) using BaSO<sub>4</sub> as the reflectance standard. Photoluminescence (PL) spectra were collected by fluorescence spectrometer (Edinburgh instruments FLS920) with a xenon lamp. The specific surface area was determined by the Brunauer-Emmett-Teller (BET) method from N<sub>2</sub> adsorption isotherms (Micromeritics ASAP2020 V4.0).

### **Photocatalytic reaction**

Photocatalytic reaction was performed in a closed circulation system bought from Beijing Perfectlight Technology Co. Ltd (Labsolar-IIIAG photocatalytic system) mainly consisting of vacuum system, cooling water, and gas analysis device. The samples (0.05 g) were dispersed in a quartz reaction cell filled with 100 mL of aqueous solution (90 mL H<sub>2</sub>O and 10 mL triethanolamine as sacrificed agent). Prior to irradiation, the reaction system was evacuated to remove the dissolved oxygen. The reaction was proceed under the illumination of a UV Xe lamp (200-400 nm). The produced hydrogen was analyzed through an on-line gas chromatograph with a TCD detector using argon as carrier gas (GC9790, FULI).

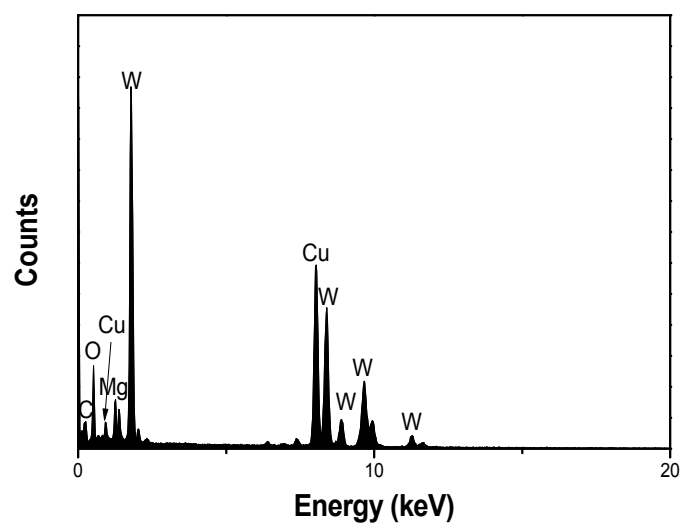

Fig. S1 EDS spectrum of  $\text{MgWO}_4$  nanoplates.

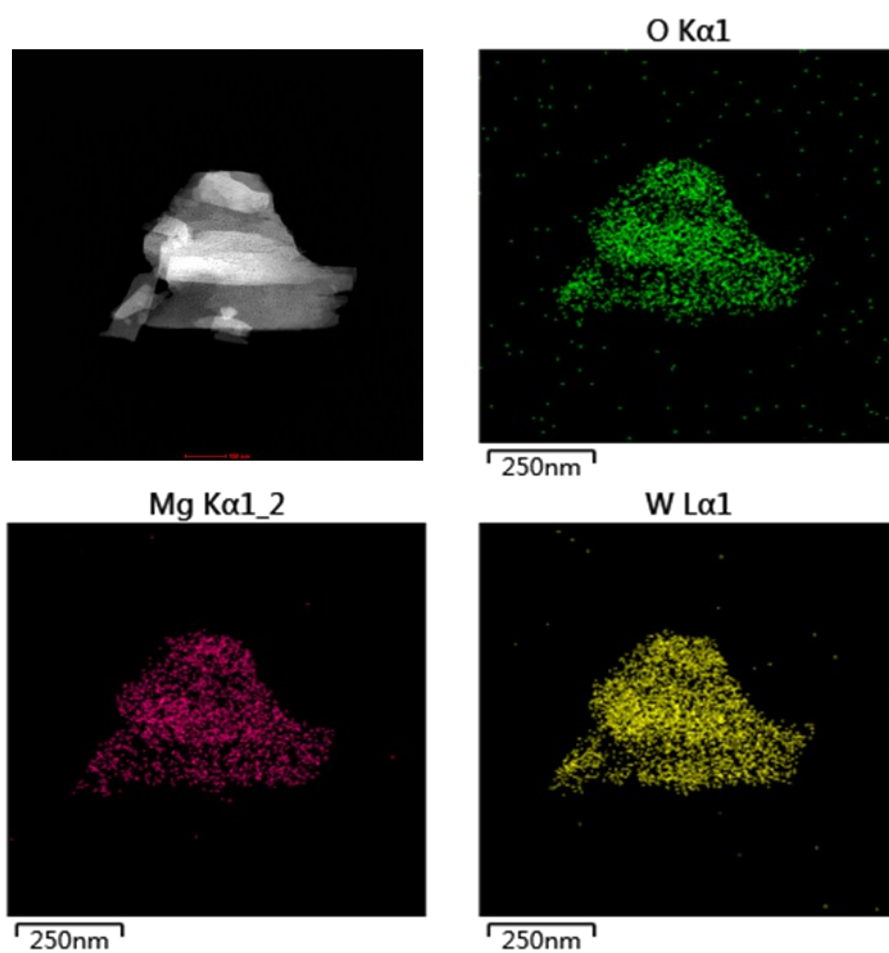

Fig. S2 EDS mapping of  $\text{MgWO}_4$  nanoplates.

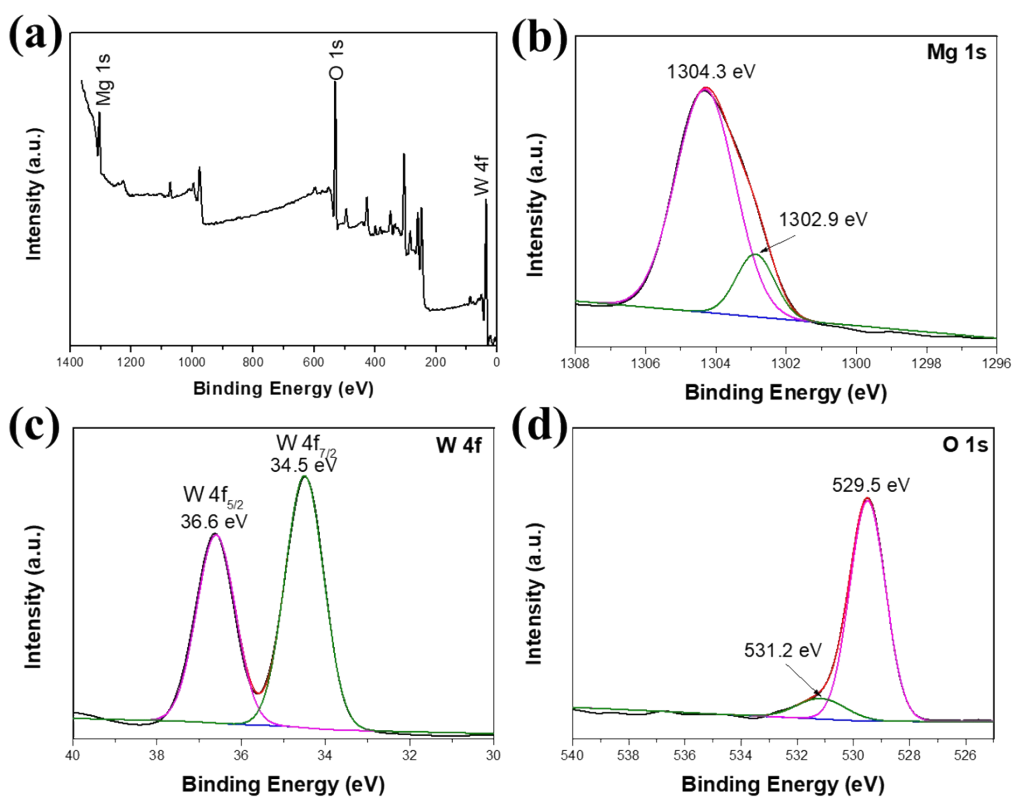

Fig. S3 XPS spectra of MgWO<sub>4</sub> nanoplates: (a) full spectrum, (b) Mg 1s, (c) W 4f and (d) O 1s.

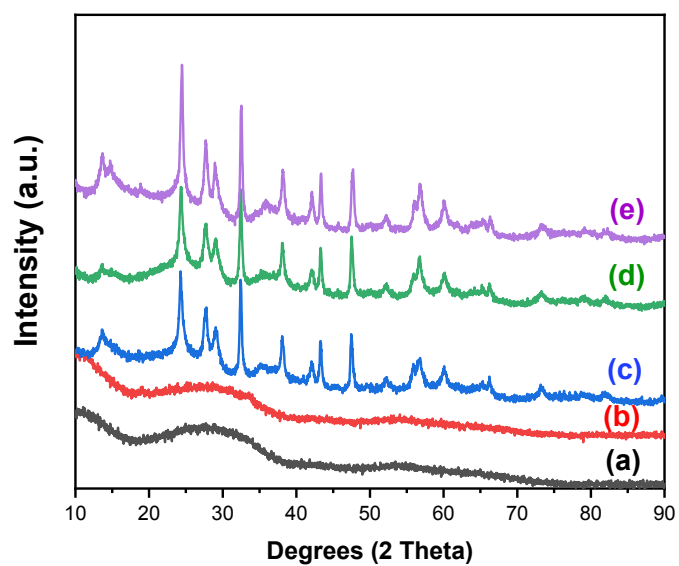

Fig. S4 XRD patterns of samples at different reaction time: (a) 10 min, (b) 30 min, (c) 1 h, (d) 2 h and (e) 12 h.

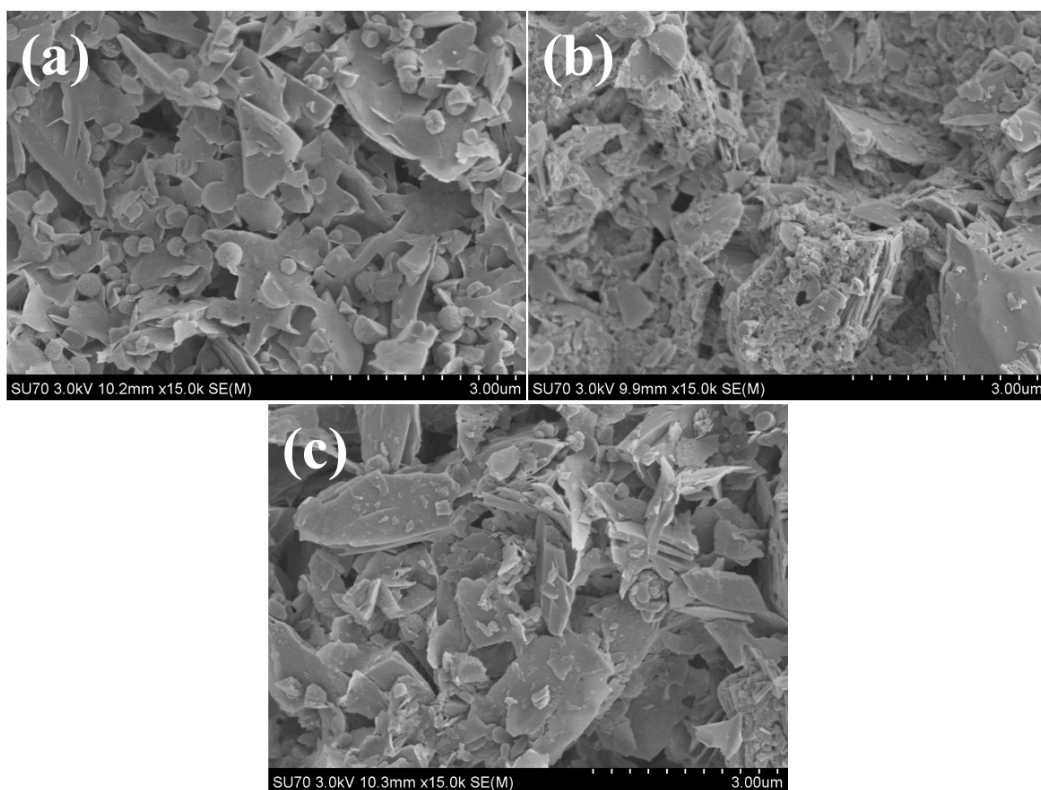

**Fig. S5** SEM images of samples at different reaction time. (a) 75 min; (b) 90 min and (c) 105 min.

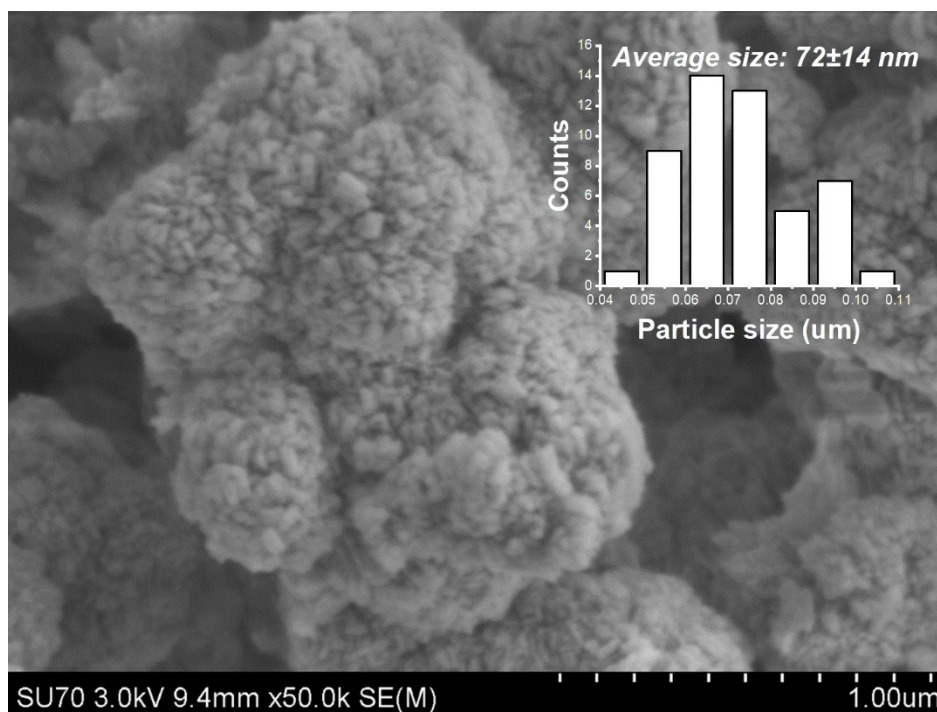

**Fig. S6** SEM images of MgWO<sub>4</sub> nanoparticles (The inset image is the particle size distribution of MgWO<sub>4</sub> nanoparticles).

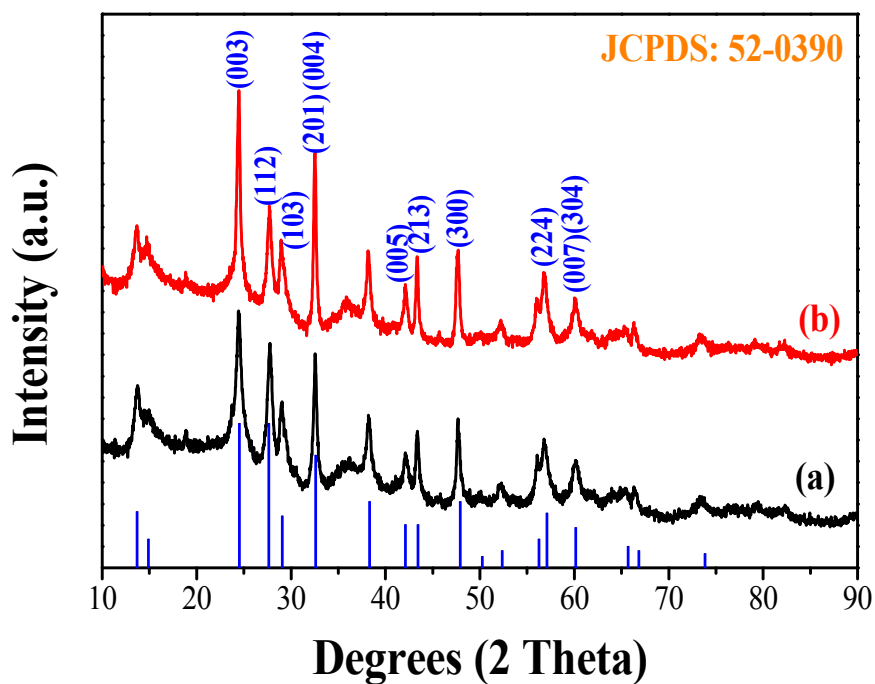

Fig. S7 XRD patterns of (a)  $\text{MgWO}_4$  nanoparticles; (b)  $\text{MgWO}_4$  nanoplates

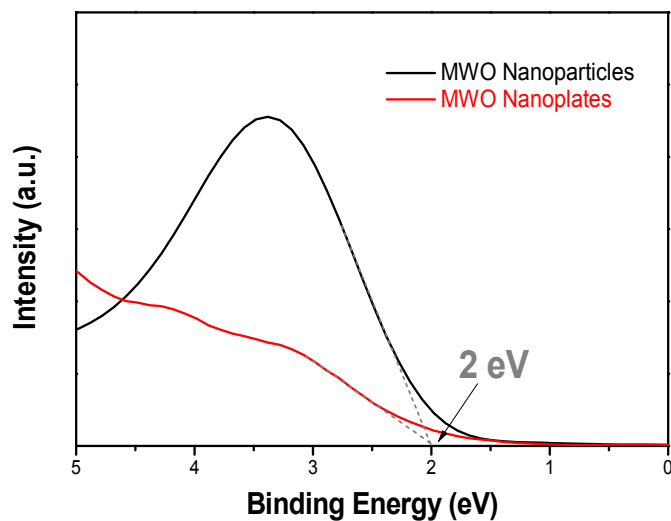

Fig. S8 XPS valence band spectra of  $\text{MgWO}_4$  nanoparticles and  $\text{MgWO}_4$  nanoplates.

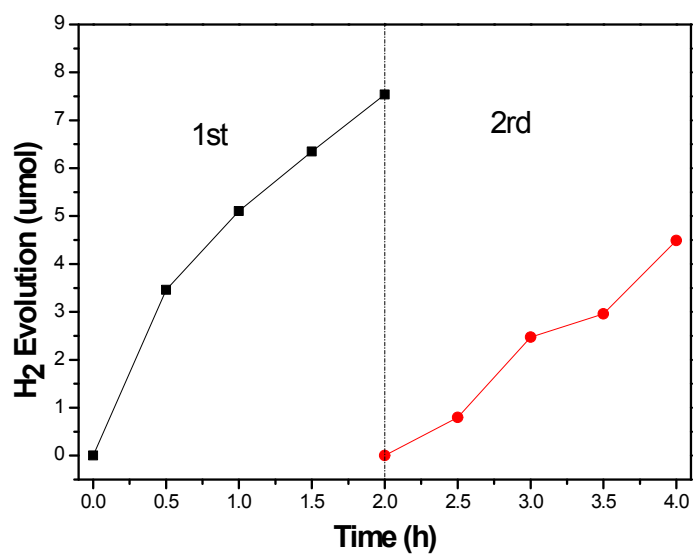

**Fig. S9** The photocatalytic hydrogen evolution rates of MgWO<sub>4</sub> nanoplates (recycled test).

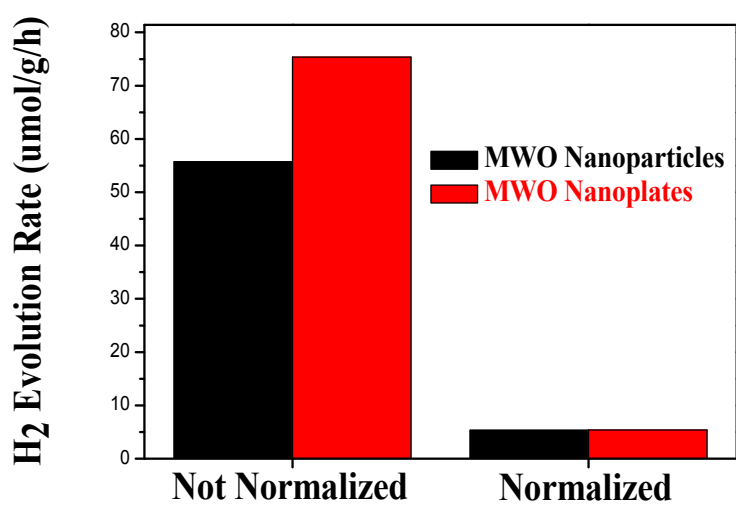

**Fig. S10** The photocatalytic hydrogen evolution rates of MgWO<sub>4</sub> nanoparticles and MgWO<sub>4</sub> nanoplates (not normalized and normalized performance by specific surface area.).

**Table S1**

The specific surface area, pore volume, and pore diameter of samples.

|                                       | <b>S<sub>BET</sub></b><br><b>(m<sup>2</sup>/g)</b> | <b>Pore Volume</b><br><b>(cm/g)</b> | <b>Pore Diameter</b><br><b>(nm)</b> |
|---------------------------------------|----------------------------------------------------|-------------------------------------|-------------------------------------|
| <b>MgWO<sub>4</sub> nanoparticles</b> | 10.46                                              | 0.03                                | 13.03                               |
| <b>MgWO<sub>4</sub> nanoplates</b>    | 14.05                                              | 0.04                                | 12.254                              |
